# Supplementary material for: Air Pollution Research Based on Spider Web and Parallel Continuous Particulate Monitoring—A Comparison Study Coupled with Identification of Sources
Source: MDPI journal article supplement (doi:10.3390/min11080812), 2021-07-27
Supplement: s1 [file s1]

**Table S1** Results obtained in monitoring with the use of Continuous Particulate Monitor.

| DATE       | PM <sub>10</sub><br>concentration<br>[µg/m <sup>3</sup> ] | Mn<br>[ng/m <sup>3</sup> ] | Fe<br>[ng/m <sup>3</sup> ] | Cu<br>[ng/m <sup>3</sup> ] | Zn<br>[ng/m <sup>3</sup> ] | Pb<br>[ng/m <sup>3</sup> ] |
|------------|-----------------------------------------------------------|----------------------------|----------------------------|----------------------------|----------------------------|----------------------------|
| 2020-02-07 | 20.00                                                     | 2.12                       | 63.67                      | 0.55                       | 23.77                      | 9.89                       |
| 2020-02-08 | 36.80                                                     | 8.04                       | 214.82                     | 3.02                       | 63.96                      | 24.24                      |
| 2020-02-09 | 23.60                                                     | 2.02                       | 48.98                      | 0.46                       | 19.35                      | 11.56                      |
| 2020-02-10 | 13.87                                                     | 3.01                       | 74.74                      | 0.64                       | 23.88                      | 6.97                       |
| 2020-02-11 | 14.50                                                     | 4.80                       | 61.50                      | 0.63                       | 23.81                      | 4.44                       |
| 2020-02-12 | 16.50                                                     | 7.74                       | 74.28                      | 1.34                       | 25.52                      | 6.54                       |
| 2020-02-13 | 16.28                                                     | 2.53                       | 53.22                      | 0.49                       | 19.35                      | 7.34                       |
| 2020-02-14 | 17.40                                                     | 2.43                       | 59.66                      | 1.33                       | 22.75                      | 8.99                       |
| 2020-02-15 | 20.39                                                     | 2.20                       | 32.70                      | 0.78                       | 15.12                      | 6.69                       |
| 2020-02-16 | 12.84                                                     | 1.65                       | 32.97                      | 1.35                       | 9.44                       | 4.97                       |
| 2020-02-17 | 25.68                                                     | 3.38                       | 85.93                      | 2.29                       | 23.92                      | 7.86                       |
| 2020-02-18 | 23.09                                                     | 2.34                       | 45.05                      | 0.95                       | 32.28                      | 10.34                      |
| 2020-02-19 | 13.50                                                     | 1.90                       | 26.31                      | 0.64                       | 15.75                      | 5.53                       |
| 2020-02-20 | 20.02                                                     | 2.55                       | 42.48                      | 1.34                       | 22.67                      | 7.96                       |
| 2020-02-21 | 21.60                                                     | 2.33                       | 37.38                      | 0.44                       | 27.25                      | 12.46                      |
| 2020-02-22 | 20.86                                                     | 2.06                       | 40.55                      | 2.14                       | 28.44                      | 8.65                       |
| 2020-02-23 | 10.71                                                     | 2.75                       | 29.85                      | 0.36                       | 14.98                      | 5.55                       |
| 2020-02-24 | 16.21                                                     | 1.25                       | 24.99                      | 0.04                       | 23.45                      | 10.06                      |
| 2020-02-25 | 13.38                                                     | 3.02                       | 49.69                      | 0.25                       | 18.73                      | 7.47                       |
| 2020-02-26 | 19.24                                                     | 1.84                       | 29.45                      | 0.18                       | 19.93                      | 10.95                      |
| 2020-02-27 | 25.19                                                     | 2.27                       | 31.51                      | 0.60                       | 28.30                      | 6.83                       |
| 2020-02-28 | 33.97                                                     | 2.58                       | 72.95                      | 2.59                       | 46.20                      | 22.43                      |
| 2020-02-29 | 14.90                                                     | 2.31                       | 49.20                      | 0.35                       | 25.75                      | 7.72                       |
| 2020-03-01 | 15.49                                                     | 2.46                       | 52.81                      | 0.52                       | 15.84                      | 5.82                       |
| 2020-03-02 | 21.03                                                     | 3.69                       | 75.83                      | 0.67                       | 26.43                      | 10.08                      |
| 2020-03-03 | 21.13                                                     | 3.33                       | 112.35                     | 1.57                       | 50.69                      | 24.59                      |
| 2020-03-04 | 30.23                                                     | 3.79                       | 105.61                     | 1.12                       | 36.37                      | 10.55                      |
| 2020-03-05 | 28.35                                                     | 4.03                       | 90.24                      | 1.07                       | 35.03                      | 12.68                      |
| 2020-03-06 | 20.02                                                     | 3.22                       | 55.93                      | 0.93                       | 27.30                      | 12.14                      |
| 2020-03-07 | 21.29                                                     | 2.14                       | 30.99                      | 5.70                       | 22.45                      | 10.13                      |
| 2020-03-08 | 22.29                                                     | 2.99                       | 61.78                      | 0.92                       | 24.68                      | 11.30                      |
| 2020-03-09 | 36.61                                                     | 6.07                       | 144.56                     | 1.82                       | 38.04                      | 14.52                      |
| 2020-03-10 | 22.28                                                     | 3.27                       | 93.16                      | 0.82                       | 23.69                      | 8.07                       |
| 2020-03-11 | 19.28                                                     | 2.84                       | 56.88                      | 0.72                       | 22.69                      | 6.58                       |
| 2020-03-12 | 11.19                                                     | 2.55                       | 69.13                      | 0.37                       | 11.11                      | 3.94                       |
| 2020-03-13 | 24.27                                                     | 3.54                       | 47.58                      | 0.70                       | 17.92                      | 5.42                       |
| 2020-03-14 | 10.47                                                     | 1.66                       | 35.73                      | 0.42                       | 10.25                      | 4.15                       |

|            |       |       |        |       |        |       |
|------------|-------|-------|--------|-------|--------|-------|
| 2020-03-15 | 27.13 | 2.80  | 83.84  | 1.28  | 40.36  | 16.25 |
| 2020-03-16 | 19.54 | 4.74  | 111.53 | 0.79  | 16.01  | 7.29  |
| 2020-03-17 | 20.09 | 3.66  | 152.76 | 1.68  | 17.89  | 7.68  |
| mean       | 20.53 | 3.10  | 66.56  | 1.10  | 25.28  | 9.67  |
| SD         | ±6.48 | ±1.46 | ±39.10 | ±1.00 | ±10.99 | ±4.95 |
| minimum    | 10.47 | 1.25  | 24.99  | 0.04  | 9.44   | 3.94  |
| maximum    | 36.80 | 8.04  | 214.82 | 5.70  | 63.96  | 24.59 |

**Table S2** Results obtained in monitoring with the use of spider webs.

|         | Cu [µg/g] | Zn [µg/g] | Pb [µg/g] | Mn [µg/g] | Fe [µg/g] |
|---------|-----------|-----------|-----------|-----------|-----------|
| 1       | 65        | 433       | 435       | 338       | 5035      |
| 2       | 144       | 397       | 1562      | 301       | 1805      |
| 3       | 266       | 687       | 2245      | 545       | 2752      |
| 4       | 88        | 217       | 186       | 677       | 7449      |
| 5       | 48        | 266       | 876       | 432       | 4481      |
| 6       | 86        | 394       | 1113      | 469       | 24191     |
| 7       | 136       | 355       | 818       | 292       | 5294      |
| 8       | 60        | 229       | 173       | 168       | 7037      |
| 9       | 64        | 380       | 303       | 301       | 6312      |
| 10      | 25        | 212       | 259       | 1418      | 10333     |
| Q1      | 60        | 229       | 259       | 301       | 4481      |
| Median  |           |           |           |           |           |
| (Q2)    | 76        | 368       | 627       | 385       | 5803      |
| Q3      | 136       | 397       | 1113      | 545       | 7449      |
| Minimum | 25        | 212       | 173       | 168       | 1805      |
| Maximum | 266       | 687       | 2245      | 1418      | 24191     |

**Table S3** Comparison of measured and certified concentrations in BCR-482 lichen [1].

| Metal | BCR-482 lichen |                             | AAS     |       |         |
|-------|----------------|-----------------------------|---------|-------|---------|
|       | Concentration  | ± Measurement               | Average | ±SD * | Dev. ** |
|       |                | uncertainty<br>[mg/kg d.m.] |         |       | [%]     |
| Mn    | 33.0           | 0.5                         | 31.7    | 0.68  | -3.9    |
| Fe    | 804            | 160                         | 771     | 154   | -4.1    |
| Ni    | 2.47           | 0.07                        | 2.16    | 0.32  | -13     |
| Cu    | 7.03           | 0.19                        | 6.63    | 0.17  | -5.7    |
| Zn    | 100.6          | 2.2                         | 95.1    | 2.3   | -5.5    |

|    |      |      |      |      |      |
|----|------|------|------|------|------|
| Cd | 0.56 | 0.02 | 0.53 | 0.03 | -5.3 |
| Pb | 40.9 | 1.4  | 38.2 | 1.0  | -6.6 |

---

\* Standard deviation

\*\* Relative difference between the measured ( $c_z$ ) and certified ( $c_c$ ) concentration  $100\% \cdot (c_z - c_c)/c_c$

[1] Świsłowski, P., Kosior, G., & Rajfur, M. (2021). The influence of preparation methodology on the concentrations of heavy metals in *Pleurozium schreberi* moss samples prior to use in active biomonitoring studies. *Environmental Science and Pollution Research*, 28, 10068–10076. <https://doi.org/10.1007/s11356-020-11484-7>
